23. Lanier WL, Iaizzo PA, Milde JH: Cerebral function and muscle afferent activity following intravenous succinylcholine in dogs anesthetized with halothane: The effects of pretreatment with a defasciculating dose of pancuronium. *ANESTHESIOLOGY* 1989; 71:87–95
24. Halldin M, Wahlin A: Effect of succinylcholine on the intraspinal fluid pressure. *Acta Anaesthesiol Scand* 1959; 3:155–61
25. Sondergard W: Intracranial pressure during general anaesthesia. *Dan Med Bul* 1961;8:18–25
26. Lewelt W, Moszynski K, Kozniowska H: Effects of depolarizing, nondepolarizing muscle relaxants and intubation on the ventricular fluid pressure. In: Beks JwF, Bosch DA, Brock M, eds. *Intracranial Pressure III*. Berlin, Springer-Verlag, 1976, pp 215–8
27. Moszyński K: Dynamic changes in cerebrospinal fluid pressure during neurosurgical operations. *Acta Neurochir (Wien)* 1976; 34:295–6
28. Marsh ML, Dunlop BJ, Shapiro HM, Gagnon RL, Rockoff MA: Succinylcholine-intracranial pressure effects in neurosurgical patients. *Anes Analg* 1980; 59:550–1
29. Minton MD, Grosslight K, Stirt JA, Bedford RF: Increases in intracranial pressure from succinylcholine: Prevention by prior nondepolarizing blockade. *ANESTHESIOLOGY* 1986; 65:165–9
30. Stirt JA, Grosslight KR, Bedford RF, Vollmer D: “Defasciculation” with metocurine prevents succinylcholine-induced increases in intracranial pressure. *ANESTHESIOLOGY* 1987; 67:50–3
31. Hartung J, Cottrell JE, Giffin JP: Absence of evidence is not evidence of absence. *ANESTHESIOLOGY* 1983; 58:298–300
32. Hartung J, Cottrell JE: Negative inferences about rare events require large samples. *ANESTHESIOLOGY* 1993; 79:1155–6
33. Patanwala AE, Erstad BL, Roe DJ, Sakles JC: Succinylcholine is associated with increased mortality when used for rapid sequence intubation of severely brain injured patients in the emergency department. *Pharmacotherapy* 2016; 36:57–63

## ANESTHESIOLOGY REFLECTIONS FROM THE WOOD LIBRARY-MUSEUM

### Chloroforming a Hoosier Holiday Turkey

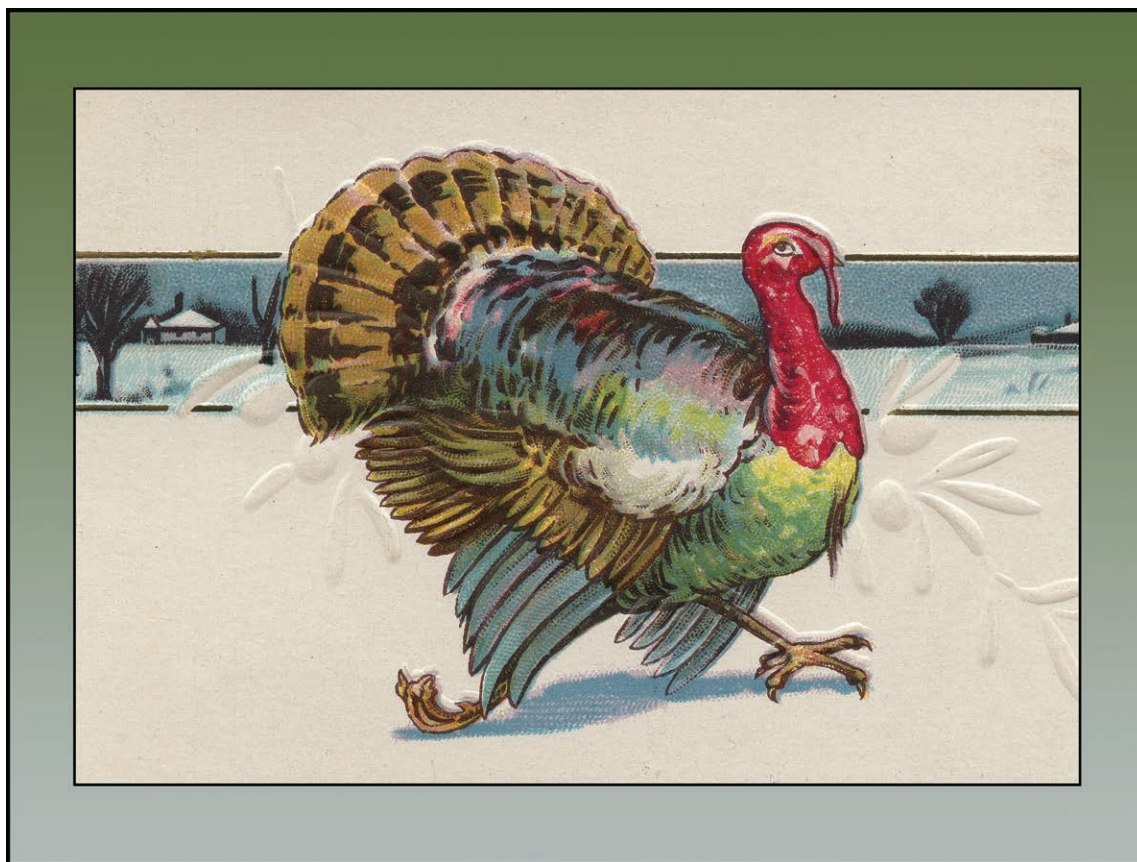

On Christmas day in 1930, *The Indianapolis Star* featured the culinary adventures of a bride-to-be from Richmond, Indiana. In attempting to dispatch her plucky-but-unplucked holiday turkey in a humane manner, the young woman had chloroformed the feisty fowl before defeathering and then refrigerating it overnight. As the *Star* recorded, when “she opened the refrigerator the next morning, the turkey had recovered from the chloroform and although weak from the plucking and cold” ...was still alive. The naked bird was chloroformed again until “thoroughly dead” and roasted in the oven. Not surprisingly, the fowl tasted foul. Indeed, the “turkey had been so thoroughly chloroformed that neither hostess nor guests could partake of it.” (Copyright © the American Society of Anesthesiologists’ Wood Library-Museum of Anesthesiology.)

George S. Bause, M.D., M.P.H., Honorary Curator and Laureate of the History of Anesthesia, Wood Library-Museum of Anesthesiology, Schaumburg, Illinois, and Clinical Associate Professor, Case Western Reserve University, Cleveland, Ohio. [UJYC@aol.com](mailto:UJYC@aol.com).
